# Supplementary material for: Cell Hashing with barcoded antibodies enables multiplexing and doublet detection for single cell genomics
Source: PubMed Central journal article supplement (PMC6300015; doi:10.1186/s13059-018-1603-1), 2018-12-19
Supplement: 13059_2018_1603_MOESM1_ESM.pdf [file 13059_2018_1603_MOESM1_ESM.pdf]

**Figure S1**

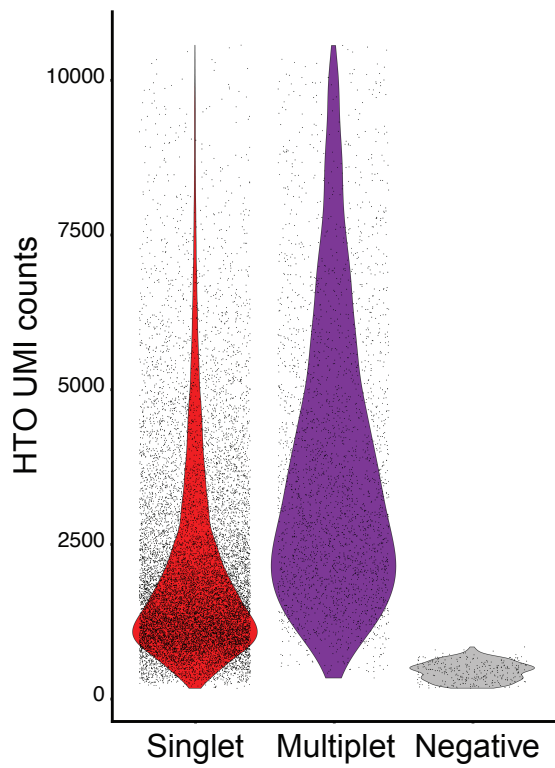

**Figure S1 | Distribution of HTO UMIs per cell barcode.** Distribution of HTO UMIs per cell barcode in cells that were characterized as singlets (red), multiplets (violet), or negatives (grey).

**Figure S2**

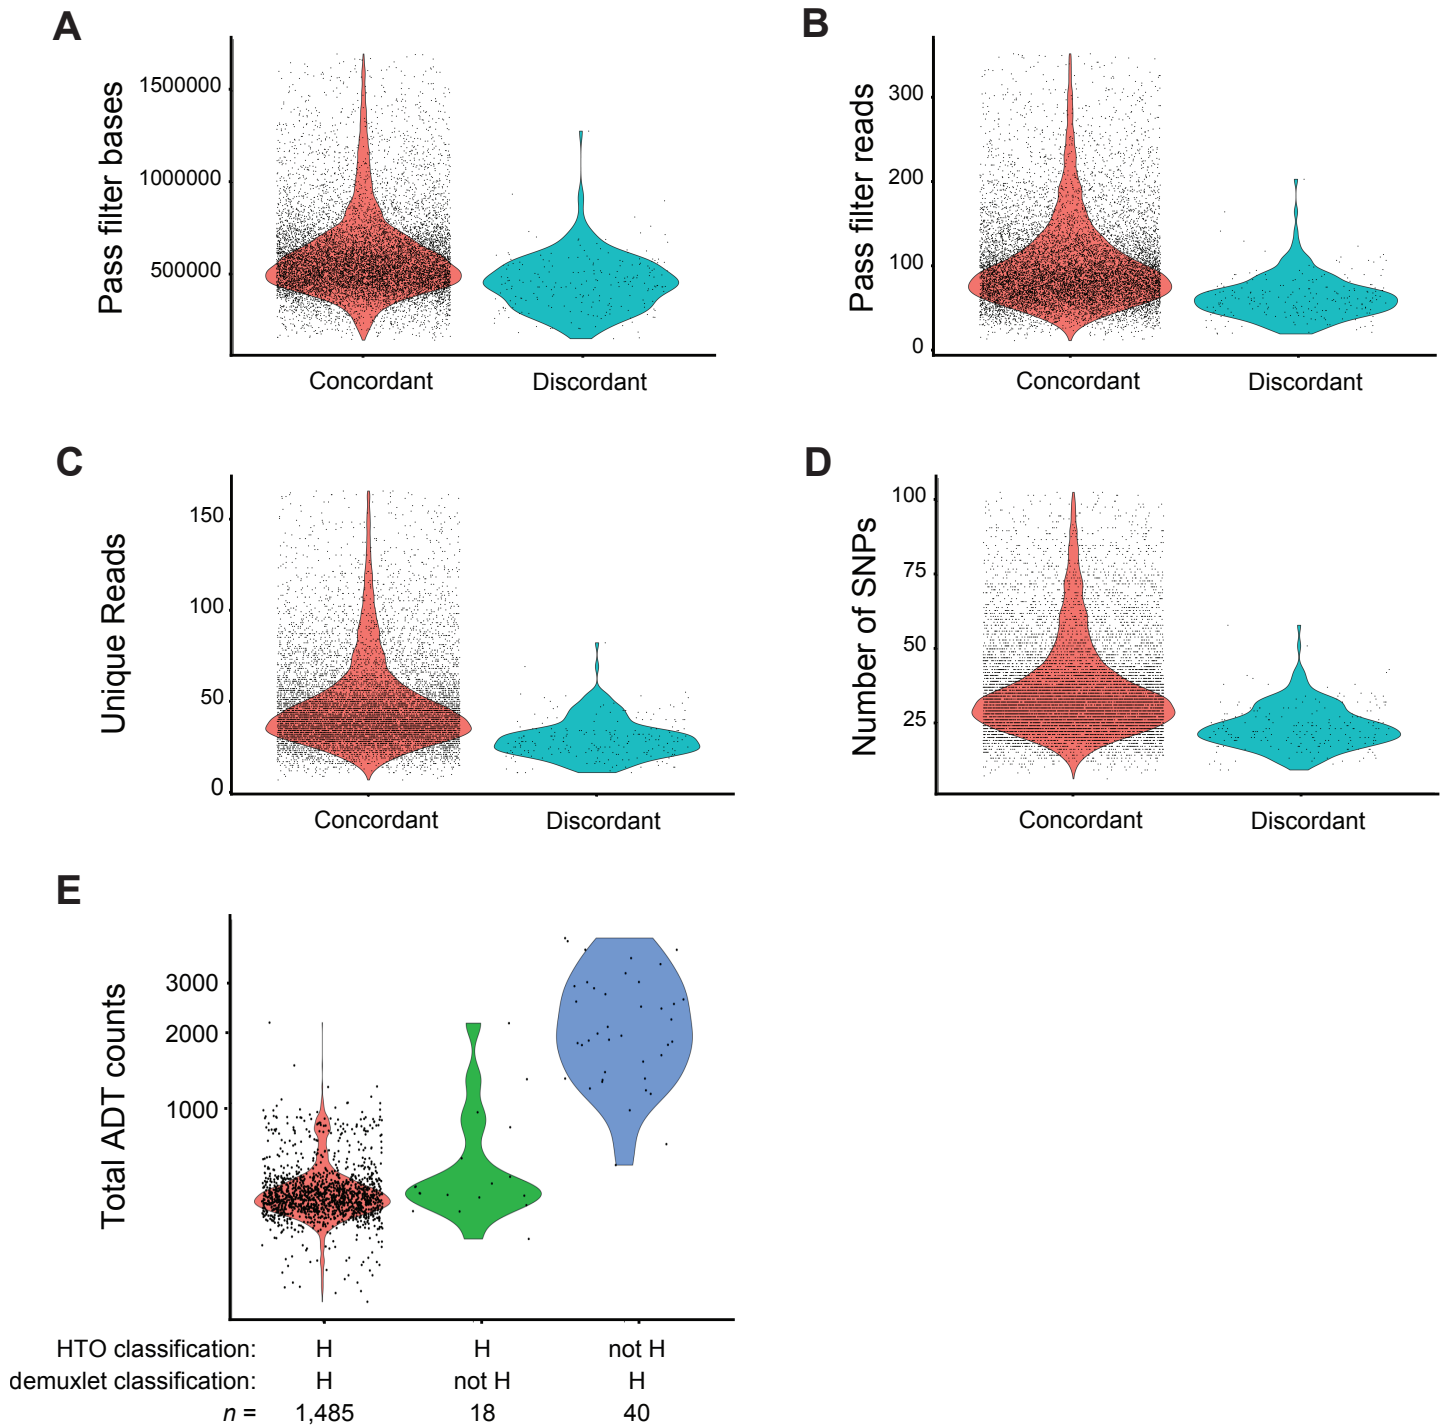

**Figure S2 | Comparison of per-cell technical metrics between concordant and discordant classifications from Cell Hashing and demuxlet.** (A-D) Represent outputs taken from demuxlet, and demonstrate that discordant calls had fewer reads, and fewer SNPs that could be used for classification. (E) Antibody-derived tag (ADT) counts in concordant and discordant singlet classifications for donor H. Donor H was not stained with CITE-seq antibodies (Methods), and therefore, cells that originate from donor H should not exhibit robust ADT counts.

**Figure S3**

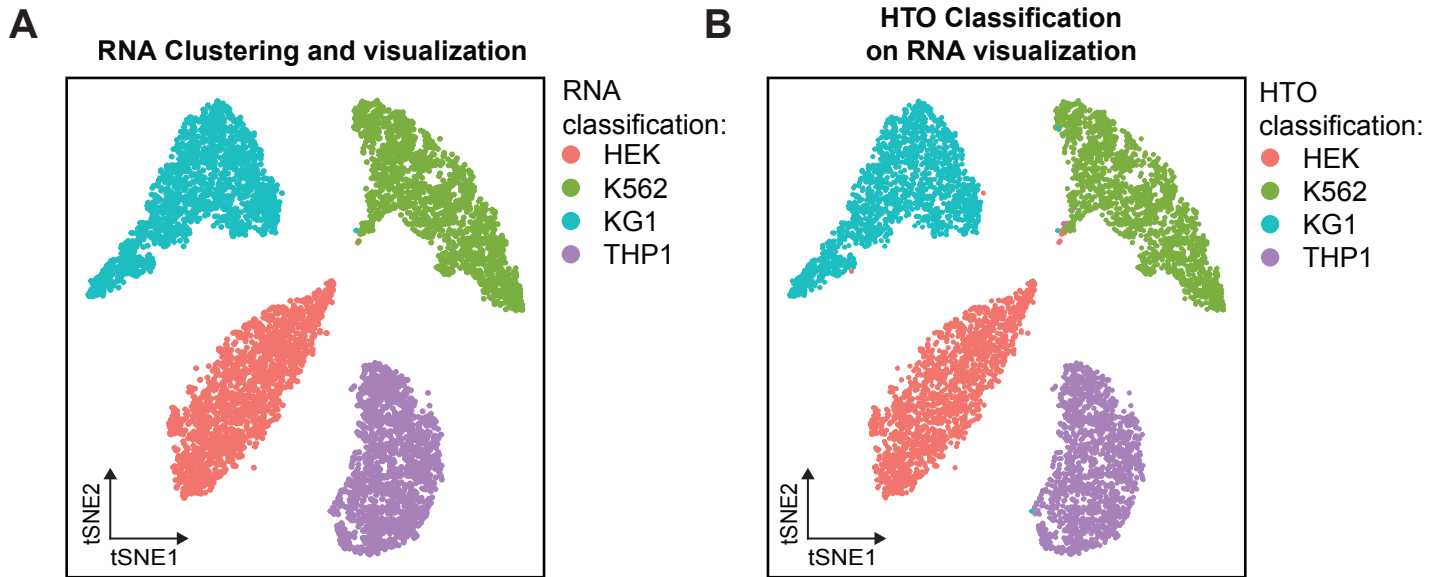

**Figure S3 | Cell Hashing experiment with four transcriptomically distinct cell lines** A) Transcriptome-based clustering of single-cell expression profiles reveals four distinct clusters, representing the HEK, THP1, K562 and KG1 cell lines in the experiment. B) Cells were visualized on the same two-dimensional tSNE plot computed from transcriptomes, but labeled based on their classification after HTO demultiplexing (each cell line was labeled with three distinct HTOs).

**Figure S4**

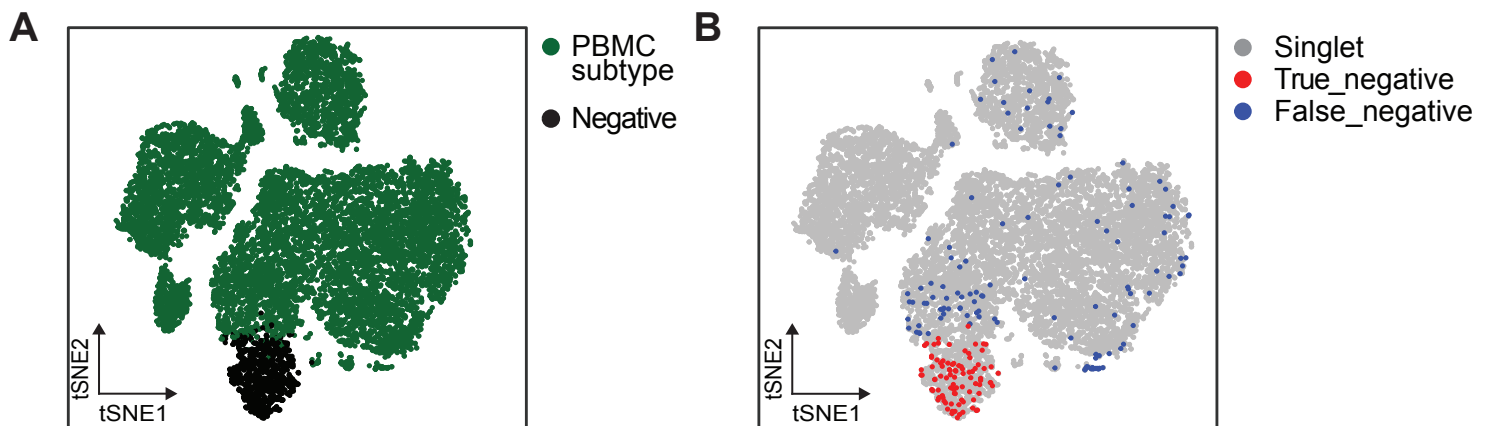

**Figure S4 | Identification of ‘false negative’ barcodes** A-B) Transcriptome-based clustering and visualization of all cell barcodes with >200 UMIs detected, that were classified as singlets or negatives based on HTO levels. We observed a transcriptomic cluster encompassing ‘negative’ barcodes that clustered separately from PBMC subtypes (A). (B) Cells are colored by their HTO classifications, revealing a small percentage of barcodes that were labeled as ‘negative’ but transcriptomically cluster with PBMC subtypes (‘false negative’ rate of 0.9%).

**Figure S5**

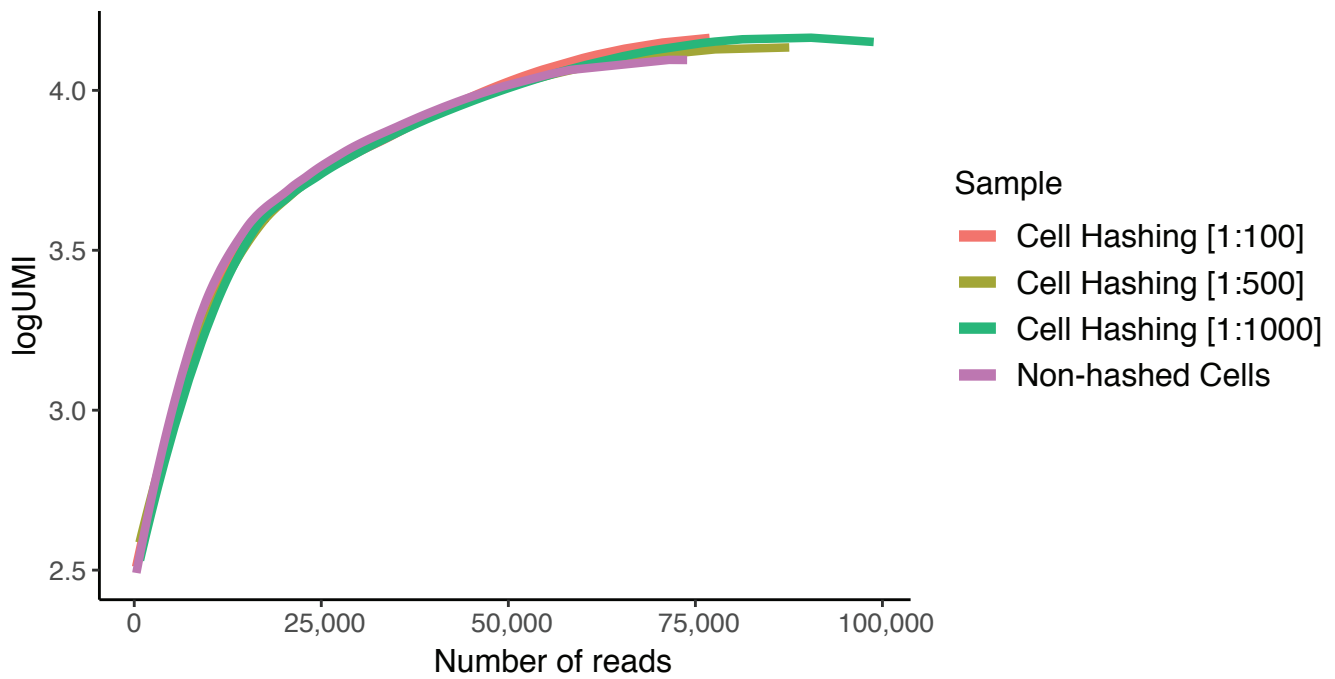

**Figure S5 | Cell Hashing does not interfere with transcript capture.** ‘Saturation’ curves showing the UMI observed per cell as a function of sequencing depth, grouped by concentrations of Cell Hashing antibodies used in a dilution series, compared to non-hashed control. We observe identical relationships across the dilution series, including in a control experiment performed without Cell Hashing.
